# Supplementary material for: Influence of exopolysaccharide EPSKar1–iron complexation on iron bioavailability and alleviating iron deficiency anaemia in Wistar rats
Source: Royal Society of Chemistry journal article supplement (doi:10.1039/d2fo03352f), 2023-01-01
Supplement: d2fo03352f1.pdf [file d2fo03352f1.pdf]

**Supplementary figure**

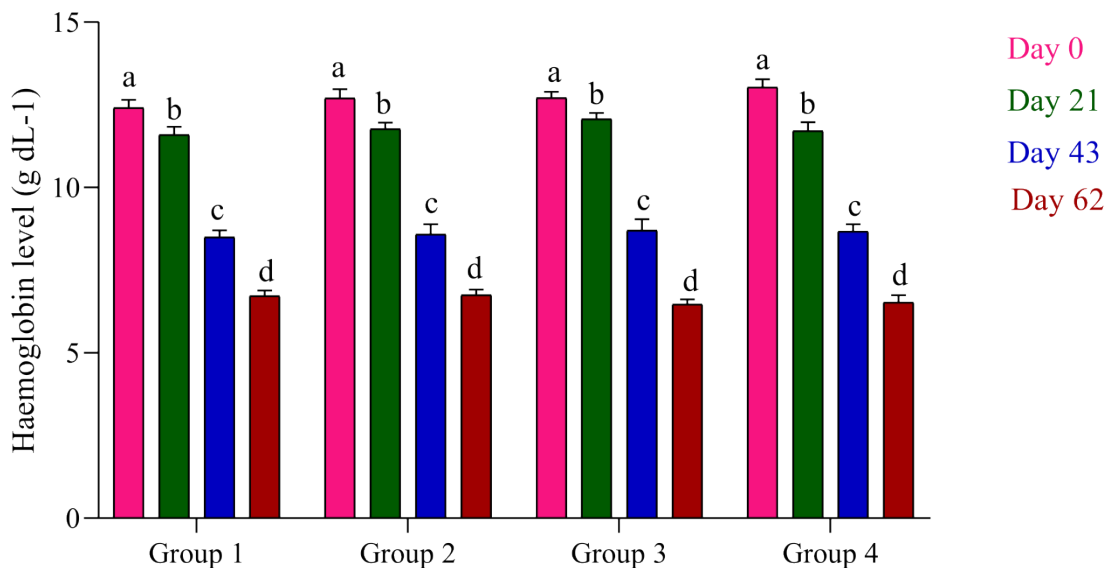

**Fig. 1S** Periodic reduction in blood hemoglobin levels upon supplementation of iron deficient diet to experimental rats. Error bars indicates the variations of eight determinants in terms of standard error of mean ( $n = 8$ ). Different superscript letters (a-d) indicate significant differences ( $p \leq 0.05$ ) in the blood hemoglobin level at different durations (*Analyzed by One-way ANOVA using Duncan Post hoc test*).
