# Supplementary material for: Influence of exopolysaccharide EPSKar1–iron complexation on iron bioavailability and alleviating iron deficiency anaemia in Wistar rats
Source: Royal Society of Chemistry journal article supplement (doi:10.1039/d2fo03352f), 2023-01-01
Supplement: d2fo03352f2.pdf [file d2fo03352f2.pdf]

**Supplementary tables**

**Table 1S** Composition of mineral mixture used in the formulation of standard basal diet

| <b>Mineral salt</b>             | <b>Quantity (g)</b> |
|---------------------------------|---------------------|
| Potassium dihydrogen phosphate  | 389.00              |
| Magnesium sulphate              | 57.30               |
| Calcium carbonate               | 381.40              |
| Manganese sulphate heptahydrate | 4.10                |
| Copper sulphate pentahydrate    | 0.477               |
| Cobalt chloride hexahydrate     | 0.023               |
| Sodium chloride                 | 139.3               |
| Potassium iodide                | 0.79                |
| Zinc sulphate heptahydrate      | 0.55                |
| Ferrous sulphate heptahydrate   | 0.025               |

**Note:** The final weight was made up to 1kg with starch

**Table 2S** Composition of vitamin mixture used in the formulation of standard basal diet

| <b>Vitamin</b>         | <b>Quantity (mg)</b> |
|------------------------|----------------------|
| Vitamin A              | 0.60                 |
| Vitamin D              | 0.05                 |
| Vitamin E              | 6.71                 |
| Cholinechloride        | 200.00               |
| Inositol               | 10.00                |
| P-aminobenzoicacid     | 10.00                |
| Niacin                 | 4.00                 |
| Calcium pantothenate   | 4.00                 |
| Vitamin K              | 0.50                 |
| Riboflavin             | 0.80                 |
| Thiamine hydrochloride | 0.50                 |
| Biotin                 | 0.04                 |
| Folic acid             | 0.20                 |
| Pyridoxine HCl         | 0.50                 |
| Vitamin B12            | 0.003                |

**Note:** The final weight was made up to 100 g with starch

**Table 3S** Composition of iron deficient synthetic diet used in the present study

| <b>Ingredients</b> | <b>Quantity (%)</b> |
|--------------------|---------------------|
| Starch             | 62                  |
| Fat                | 10                  |
| Protein            | 16                  |
| Cellulose          | 2.50                |
| Sucrose            | 7.50                |
| Mineral mixture    | 3.50                |
| Vitamin mixture    | 1.0                 |
| Choline chloride   | 0.25                |
| DL-methionine      | 0.30                |
